# Supplementary material
Source: publisher site journal article supplement (https://www.dovepress.com/article/264573)
Supplement: Supplementary file 1 [file get_supplementary_file.php]

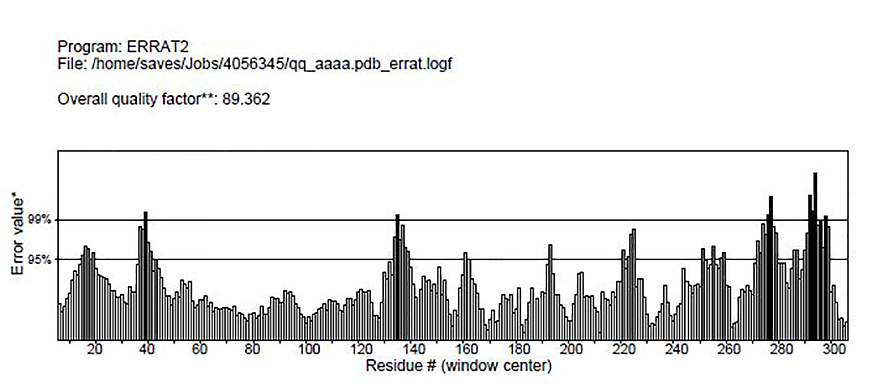


FIG.S1 Validation results of the refined 3D structure of multi-epitope vaccine structure by ERRAT software. ERRAT plot showed the overall quality score of the refined structure as 89.362.


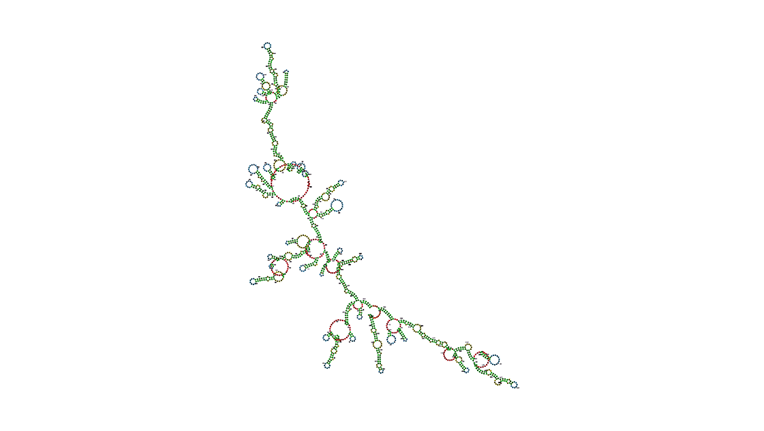


FIG.S2 The secondary structure of the m RNA vaccine construct predicted using RNAfold server.

Table.S1. Allignment of selected epitopes between SARS-COV2 and SARS (Conserved amino acids showed bold).

|  | Protein | Seq | Spice | Allignment |
| --- | --- | --- | --- | --- |
| 1 | Spike | 20-49 | COVID19 | QCVNL**TT**RTQLP **P**A**YT**N **S**FT **RGVYYPD**KV**F** |
| SARS | DLDRC**TT**FDDVQA**P**N**YT**QHT**S**SM**RGVYYPD**EI**F** |
| 2 | 418-446 (RBD1) | COVID19 | **KIADYNYKLPDDF**T**GCVIAWN** SN**N**L**D**SKVG |
| SARS | **KIADYNYKLPDDF**M**GCVLAWN**TR**N**I**D**ATST |
| 3 | 505-534 (RBD2) | COVID19 | **YQPYRVVVLSFELL**H**APATVCGPKKST**N**L**V |
| SARS | **YQPYRVVVLSFELL**N**APATVCGPKLST**D**L**I |
| 4 | N | 360-388 | COVID19 | YKTFPPTEPKKDKKKKADET QALPQRQKK |
| SARS | YKTFPPTEPKKDKKKKTDEAQPLPQRQKK |
| 5 | M | 169-198 | COVID19 | TVATSRTLSYYKLGASQRVA GDSGFAAYSR |
| SARS | TVATSRTLSYYKLGASQRVGTDSGFAAYNR |
| 6 | E | 51-71 | COVID19 | LVKPSFYVYSRVKNLNSSR VP |
| SARS | LVKPTVYVYSRVKNLNSSEGVP |
